# Oblique transmission, conformity, and preference in the evolution of altruism

Kaleda K. Denton<sup>1,\*</sup>, Yoav Ram<sup>2,3,4</sup>, Marcus W. Feldman<sup>1</sup>

<sup>1</sup>Department of Biology, Stanford University, Stanford, CA, 94305

<sup>2</sup>School of Computer Science, IDC Herzliya, Herzliya, Israel, 4610101

<sup>3</sup>School of Zoology, Faculty of Life Sciences, Tel Aviv University, Tel Aviv, Israel, 6997801

<sup>4</sup>Sagol School of Neurosciences, Tel Aviv University, Tel Aviv, Israel, 6997801

\*To whom correspondence should be addressed: [kaleda@stanford.edu](mailto:kaleda@stanford.edu)

## 1 Abstract

2 The evolution of altruism is frequently studied using models of non-random assortment, including 2  
3 kin selection. In genetic kin selection models, under certain assumptions including additive costs 3  
4 and benefits, the criterion for altruism to invade a population is Hamilton’s rule. Deviations from 4  
5 Hamilton’s rule occur when vertical transmission has cultural and genetic components, or when 5  
6 costs and benefits are combined multiplicatively. Here, we include oblique and vertical cultural 6  
7 transmission and genetic transmission in four models—two forms of parent-to-offspring altruism, 7  
8 sibling-to-sibling altruism, and altruism between offspring that meet assortatively—under additive 8  
9 or multiplicative assumptions. Oblique transmission may be conformist (anti-conformist), where 9  
10 the probability that an individual acquires a more common cultural variant is greater (less) than its 10  
11 frequency. Inclusion of conformist or anti-conformist oblique transmission may reduce or increase 11  
12 the threshold for invasion by altruism relative to Hamilton’s rule. Thresholds for invasion by 12  
13 altruism are lower with anti-conformity than with conformity, and lower or the same with additive 13  
14 rather than multiplicative fitness components. Invasion by an allele that increases the preference for 14  
15 altruism does not depend on oblique phenotypic transmission, and with sibling-to-sibling altruism, 15  
16 this allele’s invasion threshold can be higher with additive rather than multiplicative fitnesses. 16

17 *Keywords:* altruism, cooperation, kin selection, assortative meeting, oblique cultural transmission, 17  
18 anti-conformity 18

## 19 1 Introduction

20 Altruism occurs when an individual’s behaviour toward another causes the former to suffer a cost 20  
21 while the latter obtains a benefit from the former’s behaviour. Such behaviours are common in 21  
22 humans [1] and eusocial species of insects and mole-rats [2, 3, 4], and occur to varying degrees in 22  
23 many other taxa. How altruistic behaviours may evolve has intrigued biologists since Darwin [5], 23  
24 and has been the subject of a great deal of theoretical research [1, 6, 7, 8, 9, 10, 11, 12, 13]. 24

25 Hamilton [7, 8] suggested a condition for the evolution of altruism that has since become known 25  
26 as Hamilton’s rule: genetically-determined altruism will invade a population of selfish individuals 26  
27 (non-altruists) if  $\gamma < r\beta$ , where  $\gamma$  is the fitness cost to altruists,  $\beta$  is the fitness benefit to recipients of 27  
28 altruism, and  $r$  is the degree of relatedness between donors and recipients. This process of increasing 28  
29 the fitness of relatives was first called kin selection by Maynard Smith [14]. Hamilton’s rule can hold 29  
30 in population-genetic models that assume Hardy-Weinberg proportions among genotype frequencies 30  
31 after selection [15, 16, 17], known as inclusive fitness models, which are approximations of exact 31  
32 population-genetic models under weak selection [18, 19, 20]. 32

33 In exact population-genetic models, where selection can be of any strength, Hamilton’s rule 33  
34 holds only under certain assumptions [9, 20, 21, 22, 23, 24]. Cavalli-Sforza and Feldman [9] modeled 34  
35 altruism as a genetic trait, controlled by a single locus with two alleles, and found that Hamilton’s 35  
36 rule could hold when costs and benefits combined additively but not multiplicatively (see also 36  
37 [21, 25]). Departures from Hamilton’s rule also occur if altruism is affected by more than one locus 37  
38 [24] or by multiple alleles at a single locus [22], or if genetic transmission is non-vertical (e.g., via 38  
39 associated microbes) [26, 27]. In Feldman et al. [28], altruism had a genetic component controlled 39  
40 by one allele at one locus, as well as a vertically-transmitted cultural component, and costs and 40  
41 benefits combined additively. They found that conditions for invasion by altruism differed from 41  
42 Hamilton’s rule, and conditions for invasion by an allele linked to the altruistic locus differed from 42  
43 Hamilton’s rule in the case of parent-to-offspring altruism. 43

44 A general form of Hamilton’s rule (known as HRG for Hamilton’s Rule General [29]) has been 44  
45 suggested, as well as different frameworks for understanding the genetic evolution of altruism, such 45  
46 as group selection [30, 31, 32, 33] and reciprocity [13, 34, 35]. HRG is derived from the Price [36] 46

47 equation, and holds even if fitness combinations are non-additive and selection is strong [37, 38, 39]. 47  
48 However, HRG does not have predictive power (as  $\beta$  and  $\gamma$  incorporate the dependent variable, 48  
49 namely the change in average trait value over one generation) [29, 40, 41], and does not account for 49  
50 non-vertical transmission of altruism (but see [42]). Studies of altruism as a cultural trait under 50  
51 non-vertical transmission have commonly used the frameworks of group selection [43, 44, 45, 46, 47] 51  
52 or network reciprocity [48, 49, 50, 51], as opposed to kin selection (but see [28, 52]). These studies 52  
53 have reached opposing conclusions on whether conformity—a type of non-vertical transmission that 53  
54 has been defined in different ways [53] but generally refers to a tendency to adopt more common 54  
55 variants—facilitates [43, 44, 49, 50, 51] or hinders [45, 48] the evolution of altruism. 55

56 Here we build on the kin selection models of Feldman et al. [28], in which altruism had 56  
57 vertically-transmitted genetic and cultural components, and fitness components were additive. We 57  
58 incorporate oblique cultural transmission and explore cases of additive and multiplicative fitness 58  
59 components. Oblique transmission is assumed to be frequency-dependent in that the probability 59  
60 that offspring adopt a given variant is a function of its frequency in the parental generation. Two 60  
61 types of frequency-dependent transmission that we investigate are conformity and anti-conformity, 61  
62 using definitions from [44]: *under conformity (anti-conformity), the probability that an individual 62*  
63 *acquires a more common cultural variant is greater (less) than the variant's frequency.* 63

64 Our analysis includes parent-to-offspring altruism (parental care) and sibling-to-sibling altruism, 64  
65 as in [28], and altruism between offspring that meet assortatively, as in [54], which approximates 65  
66 non-random interactions that may be due to kin selection, group selection, or other forms of pop- 66  
67 ulation structure. Some definitions of altruism exclude parent-to-offspring altruism, but we use 67  
68 the definition from [10]: *altruists are individuals that sacrifice their fitness to benefit that of other 68*  
69 *individuals.* Altruists can be parents and recipients can be their offspring, and the reduction of 69  
70 parents' fitness is in terms of future offspring not produced. Conditions are derived under which 70  
71 altruism, and an allele that increases the preference for altruism, can invade a population initially 71  
72 fixed on selfishness, or an allele corresponding to a lower preference for altruism, respectively. 72

## 73 2 Models 73

74 In a population of sexually reproducing haploids there are two possible phenotypes, altruism (phe- 74  
75 notype 1) and selfishness (phenotype 2), and two genotypes,  $A$  and  $a$ , that affect the transmission 75  
76 of these phenotypes. The four phenogenotypes,  $A_1, A_2, a_1, a_2$ , have frequencies  $u_1, u_2, u_3, u_4$ , re- 76  
77 spectively, in the parental generation,  $\tilde{u}_1, \tilde{u}_2, \tilde{u}_3, \tilde{u}_4$ , in the offspring generation after transmission, 77  
78 and  $u'_1, u'_2, u'_3$ , and  $u'_4$  after selection, which follows transmission. 78

### 79 2.1 Transmission 79

80 Transmission is vertical with probability  $\rho$  and oblique with probability  $1 - \rho$ . If vertical transmis- 80  
81 sion occurs, as in [28], one of the two parents is randomly chosen to be the “transmitting parent.” 81  
82 An offspring initially acquires its transmitting parent's phenotype and then adjusts its phenotype 82  
83 based on its preference, which is affected by genotypes  $A$  and  $a$ ; thus,  $b_{A_1}, b_{A_2}, b_{a_1}$ , and  $b_{a_2}$  represent 83  
84 phenogenotypes' preferences for altruism. An offspring with initial phenogenotype  $i$  becomes altru- 84  
85 istic with probability  $b_i$  and selfish with probability  $1 - b_i$  (Figure 1). Purely genetic transmission 85  
86 entails that  $b_{A_1} = b_{A_2} = 1$  and  $b_{a_1} = b_{a_2} = 0$ , in which case individuals with allele  $A$  are altruists 86  
87 and those with  $a$  are selfish. 87

88 If transmission is oblique, the probability that an offspring initially acquires altruism (before 88  
89 exercising its preference,  $b_i$ ) is  $f(u_1 + u_3)$ , and the probability that it initially acquires selfishness 89  
90 is  $f(u_2 + u_4) = 1 - f(u_1 + u_3)$ .  $f(x)$  may take any form of frequency-dependent transmission 90  
91 with  $f(0) = 0$ ,  $f(1) = 1$ , and for a small frequency,  $\varepsilon$  (because we focus on initial increase),  $f(\varepsilon) =$  91  
92  $c\varepsilon + O(\varepsilon^2)$ , where  $c$  is a positive constant. In the conformity model of Boyd and Richerson [44], if  $n$  is 92

93 the number of cultural role models that an offspring randomly samples from the parental generation, 93  
 94 then  $0 < c < 1$  with conformity and  $1 < c < n$  with anti-conformity (see electronic supplementary 94  
 95 material [hereafter, ESM] 1 and Eq. (29) of [55]). Ultimately, under oblique transmission, the 95  
 96 probability that an offspring of genotype  $A$  ( $a$ ) becomes altruistic is  $S$  ( $U$ ) and the probability that 96  
 97 it becomes selfish is  $T$  ( $V$ ), where 97

$$98 \quad \begin{aligned} S &= b_{A_1}f(u_1 + u_3) + b_{A_2}f(u_2 + u_4) & T &= (1 - b_{A_1})f(u_1 + u_3) + (1 - b_{A_2})f(u_2 + u_4) \\ U &= b_{a_1}f(u_1 + u_3) + b_{a_2}f(u_2 + u_4) & V &= (1 - b_{a_1})f(u_1 + u_3) + (1 - b_{a_2})f(u_2 + u_4). \end{aligned} \quad (1) \quad 98$$

99 Let  $W$  ( $Y$ ) be the probability that the transmitting parent is altruistic and the offspring has allele 99  
 100  $A$  ( $a$ ), and  $X$  ( $Z$ ) be the probability that the transmitting parent is selfish and the offspring has 100  
 101 allele  $A$  ( $a$ ), as in ESM 2. 101

$$102 \quad \begin{aligned} W &= u_1^2 + u_1u_2 + u_1u_3 + \frac{1}{2}u_1u_4 + \frac{1}{2}u_2u_3 & X &= u_2^2 + u_1u_2 + u_2u_4 + \frac{1}{2}u_1u_4 + \frac{1}{2}u_2u_3 \\ Y &= u_3^2 + u_3u_4 + u_1u_3 + \frac{1}{2}u_1u_4 + \frac{1}{2}u_2u_3 & Z &= u_4^2 + u_3u_4 + u_2u_4 + \frac{1}{2}u_1u_4 + \frac{1}{2}u_2u_3. \end{aligned} \quad (2) \quad 102$$

103 After vertical and oblique transmission, the frequencies of  $A_1, A_2, a_1, a_2$  are, respectively, 103

$$104 \quad \tilde{u}_1 = \rho(b_{A_1}W + b_{A_2}X) + (1 - \rho)(u_1 + u_2)S \quad (3a) \quad 104$$

$$105 \quad \tilde{u}_2 = \rho[(1 - b_{A_1})W + (1 - b_{A_2})X] + (1 - \rho)(u_1 + u_2)T \quad (3b) \quad 105$$

$$106 \quad \tilde{u}_3 = \rho(b_{a_1}Y + b_{a_2}Z) + (1 - \rho)(u_3 + u_4)U \quad (3c) \quad 106$$

$$107 \quad \tilde{u}_4 = \rho[(1 - b_{a_1})Y + (1 - b_{a_2})Z] + (1 - \rho)(u_3 + u_4)V. \quad (3d) \quad 107$$

## 109 2.2 Selection 109

108 Selection follows transmission. Altruistic offspring suffer a fitness cost  $\gamma$  ( $0 < \gamma < 1$ ) whereas selfish 110  
 111 offspring do not. Offspring may also receive a fitness benefit  $\beta$  ( $0 < \beta$ ) from either a parent (Models 111  
 112 I and II), sibling (Model III), or member of the offspring generation (Model IV) that is altruistic. 112

### 113 2.2.1 Additive Models 113

114 Let  $y$  refer to the potential donor (either a parent, a sibling, or another member of the offspring 114  
 115 generation), which, if it is an altruist, donates a fitness benefit to the recipient. Then 115

$$116 \quad \bar{w}u'_1 = \tilde{u}_1 \left[ 1 - \gamma + \beta \frac{\text{P}(y \text{ has phenotype 1 and offspring has } A_1)}{\text{P}(\text{offspring has } A_1)} \right] \quad (4a) \quad 116$$

$$= \tilde{u}_1(1 - \gamma) + \beta \text{P}(y \text{ has phenotype 1 and offspring has } A_1)$$

$$117 \quad \bar{w}u'_2 = \tilde{u}_2 + \beta \text{P}(y \text{ has phenotype 1 and offspring has } A_2) \quad (4b) \quad 117$$

$$118 \quad \bar{w}u'_3 = \tilde{u}_3(1 - \gamma) + \beta \text{P}(y \text{ has phenotype 1 and offspring has } a_1) \quad (4c) \quad 118$$

$$119 \quad \bar{w}u'_4 = \tilde{u}_4 + \beta \text{P}(y \text{ has phenotype 1 and offspring has } a_2), \quad (4d) \quad 119$$

120 where the normalizer,  $\bar{w}$ , is the sum of the right-hand sides, which we refer to as mean fitness, and 120  
 121  $\tilde{u}_1, \tilde{u}_2, \tilde{u}_3, \tilde{u}_4$  are given by (3). 121

122 In Model I, the potential donor,  $y$ , is a randomly-selected parent. The calculation of  $\text{P}(y$  has 122  
 123 phenotype 1 and offspring has  $A_1$ ) is in ESM 2, and the corresponding parts of equations (4b-d) 123  
 124 are calculated similarly. Table S2.1 shows the possible mating pairs and corresponding offspring 124  
 125 phenogenotypes and Table S2.2 includes the probability that the parent that is selected to benefit 125  
 126 the offspring is altruistic (ESM 2). The recursions after transmission and selection in Model I are 126

$$127 \quad \begin{aligned} \bar{w}u'_1 &= \tilde{u}_1(1 - \gamma) + \beta \{ \rho [ b_{A_1} ( u_1^2 + u_1u_3 + \frac{1}{2}u_1u_2 + \frac{1}{4}u_1u_4 + \frac{1}{4}u_2u_3 ) \\ &\quad + b_{A_2} ( \frac{1}{2}u_1u_2 + \frac{1}{4}u_1u_4 + \frac{1}{4}u_2u_3 ) ] + (1 - \rho)WS \} \end{aligned} \quad (5a) \quad 127$$

$$\bar{w}u'_2 = \tilde{u}_2 + \beta\{\rho[(1 - b_{A_1})(u_1^2 + u_1u_3 + \frac{1}{2}u_1u_2 + \frac{1}{4}u_1u_4 + \frac{1}{4}u_2u_3) + (1 - b_{A_2})(\frac{1}{2}u_1u_2 + \frac{1}{4}u_1u_4 + \frac{1}{4}u_2u_3)] + (1 - \rho)WT\} \quad (5b) \quad 128$$

$$\bar{w}u'_3 = \tilde{u}_3(1 - \gamma) + \beta\{\rho[b_{a_1}(u_3^2 + u_1u_3 + \frac{1}{2}u_3u_4 + \frac{1}{4}u_1u_4 + \frac{1}{4}u_2u_3) + b_{a_2}(\frac{1}{2}u_3u_4 + \frac{1}{4}u_1u_4 + \frac{1}{4}u_2u_3)] + (1 - \rho)YU\} \quad (5c) \quad 129$$

$$\bar{w}u'_4 = \tilde{u}_4 + \beta\{\rho[(1 - b_{a_1})(u_3^2 + u_1u_3 + \frac{1}{2}u_3u_4 + \frac{1}{4}u_1u_4 + \frac{1}{4}u_2u_3) + (1 - b_{a_2})(\frac{1}{2}u_3u_4 + \frac{1}{4}u_1u_4 + \frac{1}{4}u_2u_3)] + (1 - \rho)YV\}, \quad (5d) \quad 130$$

131 where  $\bar{w}$  is the mean fitness,  $S, T, U, V$  are given in (1) and  $W, X, Y, Z$  are given in (2). 131

132 In Model II, the potential donor,  $y$ , is the transmitting parent. The difference between Models 132  
133 I and II is illustrated in Figure S3.1 (ESM 3); the oblique terms are the same as in Model I and 133  
134 the vertical terms change in the same way as in Model II of [28]: 134

$$\bar{w}u'_1 = \tilde{u}_1(1 - \gamma) + \beta\{\rho b_{A_1}W + (1 - \rho)WS\} \quad (6a) \quad 135$$

$$\bar{w}u'_2 = \tilde{u}_2 + \beta\{\rho(1 - b_{A_1})W + (1 - \rho)WT\} \quad (6b) \quad 136$$

$$\bar{w}u'_3 = \tilde{u}_3(1 - \gamma) + \beta\{\rho b_{a_1}Y + (1 - \rho)YU\} \quad (6c) \quad 137$$

$$\bar{w}u'_4 = \tilde{u}_4 + \beta\{\rho(1 - b_{a_1})Y + (1 - \rho)YV\}. \quad (6d) \quad 138$$

139 In Model III, the potential donor,  $y$ , is a sibling, and the transmitting parent is the same for 139  
140 the two siblings (i.e., uniparental transmission). ESM 2 shows the calculation of  $P(y$  has phenotype 140  
141 1 and recipient has  $A_1$ ), and the corresponding parts of (4b-d) are calculated similarly. Note that 141  
142 because both siblings' phenotypes depend on preferences  $b_i$ , there are terms with  $b_i^2$ , whereas  $b_i$  142  
143 only appears to the first power in the parent-to-offspring altruism models. The recursion for  $A_1$  in 143  
144 Model III is below and the other recursions are in ESM 4, equations (S4.1). 144

$$\begin{aligned} \bar{w}u'_1 = & \tilde{u}_1(1 - \gamma) + \beta\{\rho\{b_{A_1}(u_1 + u_2)[b_{A_1}u_1 + \frac{1}{4}(b_{A_1} + b_{a_1})u_3] + b_{A_2}(u_1 + u_2)[b_{A_2}u_2 \\ & + \frac{1}{4}(b_{A_2} + b_{a_2})u_4] + \frac{1}{4}(u_3 + u_4)[b_{A_1}(b_{A_1} + b_{a_1})u_1 + b_{A_2}(b_{A_2} + b_{a_2})u_2]\} \\ & + (1 - \rho)\{S^2(u_1^2 + u_2^2 + 2u_1u_2) + \frac{1}{2}S(S + U)(u_1u_3 + u_2u_4 + u_1u_4 + u_2u_3)\}\}. \end{aligned} \quad (7) \quad 145$$

146 In Model IV, the potential donor,  $y$ , is another offspring. Following the assortative meeting 146  
147 model of Eshel and Cavalli-Sforza [54], let  $0 < m < 1$  be the probability that an individual 147  
148 non-randomly encounters another of the same phenotype, and  $1 - m$  be the probability of random 148  
149 encounters. The probability that the potential donor,  $y$ , is an altruist (after transmission) is  $\tilde{u}_1 + \tilde{u}_3$ , 149  
150 and for each altruist, the probability of encountering another altruist is  $m + (1 - m)(\tilde{u}_1 + \tilde{u}_3)$ , as in 150  
151 [54]. For a selfish individual, the probability of encountering an altruist is  $(1 - m)(\tilde{u}_1 + \tilde{u}_3)$ . The 151  
152 recursions are 152

$$\begin{aligned} \bar{w}u'_1 = & \tilde{u}_1(1 - \gamma) + \tilde{u}_1\beta\{m + (1 - m)(\tilde{u}_1 + \tilde{u}_3)\} \\ & = \tilde{u}_1[1 - \gamma + \beta\{m + (1 - m)(\tilde{u}_1 + \tilde{u}_3)\}] \end{aligned} \quad (8a) \quad 153$$

$$\bar{w}u'_2 = \tilde{u}_2[1 + \beta(1 - m)(\tilde{u}_1 + \tilde{u}_3)] \quad (8b) \quad 154$$

$$\bar{w}u'_3 = \tilde{u}_3[1 - \gamma + \beta\{m + (1 - m)(\tilde{u}_1 + \tilde{u}_3)\}] \quad (8c) \quad 155$$

$$\bar{w}u'_4 = \tilde{u}_4[1 + \beta(1 - m)(\tilde{u}_1 + \tilde{u}_3)]. \quad (8d) \quad 156$$

## 158 2.2.2 Multiplicative Models 158

159 If costs and benefits combine multiplicatively, then 159

$$\begin{aligned} \bar{w}u'_1 = & \tilde{u}_1(1 - \gamma) \left[ 1 + \beta \frac{P(y \text{ has phenotype 1 and recipient has } A_1)}{P(\text{recipient has } A_1)} \right] \\ & = \tilde{u}_1(1 - \gamma) + (1 - \gamma)\beta P(y \text{ has phenotype 1 and recipient has } A_1) \end{aligned} \quad (9a) \quad 160$$

$$\bar{w}u'_2 = \tilde{u}_2 + \beta P(y \text{ has phenotype 1 and recipient has } A_2) \quad (9b) \quad 161$$

$$\bar{w}u'_3 = \tilde{u}_3(1 - \gamma) + (1 - \gamma)\beta P(y \text{ has phenotype 1 and recipient has } a_1) \quad (9c) \quad 162$$

$$\bar{w}u'_4 = \tilde{u}_4 + \beta P(y \text{ has phenotype 1 and recipient has } a_2), \quad (9d) \quad 163$$

164 where  $\bar{w}$  is the mean fitness. Recursions (9b) and (9d) are the same as additive recursions (4b) 164  
 165 and (4d), respectively, whereas the recursions for altruistic phenogenotypes differ; in (9a) and (9c) 165  
 166  $(1 - \gamma)\beta$  appears where  $\beta$  appeared in (4a) and (4c). 166

### 167 3 Conditions for Invasion by Altruism 167

#### 168 3.1 Invasion by Altruism in the Additive Case 168

169 Suppose that the population is initially fixed on selfishness, in which case selfish individuals cannot 169  
 170 become altruistic ( $b_{A_2} = b_{a_2} = 0$ ; see ESM 5). There is no selection on  $A$  versus  $a$ , and the 170  
 171 initial equilibrium is a point on the neutral curve  $(u_1, u_2, u_3, u_4) = (0, \hat{u}_2, 0, \hat{u}_4)$ . Near one of 171  
 172 these equilibria, altruistic phenogenotypes  $A_1$  and  $a_1$  are introduced at small frequencies, denoted 172  
 173 by  $u_1 = \varepsilon_1$  and  $u_3 = \varepsilon_3$ . We assume that the preference for altruism (Figure 1) is genotype- 173  
 174 independent with  $b_{A_1} = b_{a_1} = b$  as in [28]; otherwise, invasion conditions become very difficult to 174  
 175 calculate and interpret (e.g., see Eq. (S5.1) in ESM 5). For all models, the sum of the linearized 175  
 176 recursions for frequencies of  $A_1$  and  $a_1$ , respectively, is (ESM 5) 176

$$177 \quad \varepsilon'_1 + \varepsilon'_3 = b(\varepsilon_1 + \varepsilon_3)[\rho(1 - \gamma + m_v\beta) + (1 - \rho)c(1 - \gamma + m_o\beta)], \quad 177$$

178 where  $m_o$  and  $m_v$  vary depending on the model and are given in Result 1 below. Altruism increases 178  
 179 if  $\varepsilon'_1 + \varepsilon'_3 > \varepsilon_1 + \varepsilon_3$ , expressed as Result 1. 179

180 **Result 1. In additive models, the condition for invasion by altruism of a population** 180  
 181 **that is initially all selfish is** 181

$$182 \quad b[\rho(1 - \gamma + m_v\beta) + (1 - \rho)c(1 - \gamma + m_o\beta)] > 1, \quad (10) \quad 182$$

183 where  $m_v$  and  $m_o$  are assortment parameters for vertical and oblique transmission, 183  
 184 respectively. 184

$$185 \quad \begin{aligned} m_v &= \frac{1}{2}, 1, b, m \text{ in Models I-IV, respectively;} \\ m_o &= 0 \text{ in Models I-III; and} \\ m_o &= m \text{ in Model IV.} \end{aligned} \quad (11) \quad 185$$

186 Inequality (10) can be rearranged to  $\beta \left( \frac{\rho m_v + (1 - \rho) c m_o}{\rho + (1 - \rho) c} \right) > \gamma + \frac{1}{b[\rho + (1 - \rho) c]} - 1$ , where  $\frac{\rho m_v + (1 - \rho) c m_o}{\rho + (1 - \rho) c}$  186  
 187 takes the place of relatedness ( $r$ ) in Hamilton's rule and assortment ( $m$ ) in  $m\beta > \gamma$ . The term 187  
 188  $\frac{1}{b[\rho + (1 - \rho) c]} - 1$  is the adjustment due to transmission bias, which raises the threshold for invasion if 188  
 189 it is positive and lowers the threshold if it is negative. This term is negative if there is sufficiently 189  
 190 strong anti-conformist oblique transmission (i.e.,  $0 \leq \rho < 1$  and  $1 < c < n$ ). 190

191 By (10), increasing  $c$  and increasing  $b$  (the preference for altruism) facilitates invasion by al- 191  
 192 truism. Examples for Model I are in Figure 2, and examples for all models are in ESM 6 (code is 192  
 193 available at <https://github.com/kaleda/altruism-conformity>). The relationship between inequality 193  
 194 (10) and  $\rho$  is more complicated. If  $\rho = 1$  inequality (10) becomes 194

$$195 \quad b(1 - \gamma + m_v\beta) > 1, \quad (12) \quad 195$$

196 which gives the same results as in [28] for Models I-III. If  $\rho = 0$ , inequality (10) becomes 196

$$197 \quad bc(1 - \gamma + m_o\beta) > 1. \quad (13) \quad 197$$

198 If the left-hand side of (12) is greater than the left-hand side of (13), increasing  $\rho$  (vertical trans- 198  
mission) facilitates invasion (by (10)). If the opposite is true, decreasing  $\rho$  facilitates invasion. 199

200 *Remark 1. (i) In all models,  $m_v \geq m_o$ ; therefore, with conformity ( $0 < c < 1$ ), increasing  $\rho$  200  
facilitates invasion by altruism. (ii) In Model IV,  $m_v = m_o$ , and with anti-conformity ( $1 < c < n$ ) 201  
decreasing  $\rho$  facilitates invasion by altruism. 202*

203 Inequality (10) can be compared to the condition for invasion by altruism under purely genetic 203  
transmission, namely Hamilton's rule,  $\frac{1}{2}\beta > \gamma$ , for Models I-III [28] and  $m\beta > \gamma$  for Model IV [54]. 204  
We rearrange (10) to isolate  $\frac{1}{2}\beta$  (in Models I-III) or  $m\beta$  (in Model IV) on the left-hand side, and 205  
then determine when the right-hand side is less than  $\gamma$ , producing a lower threshold for invasion 206  
than in the case of purely genetic transmission. We find 207

208 **Result 2. In additive models, the threshold for invasion by altruism in (10) is lower 208  
than the threshold for invasion with purely genetic transmission if 209**

$$210 \quad (1 - \rho)c > \frac{1 - 2b\rho m_v \gamma}{b(1 - \gamma)} - \rho, \text{ where } b, \rho \neq 0, \text{ in Models I-III, and} \quad (14a) \quad 210$$

$$211 \quad (1 - \rho)c > \frac{1}{b} - \rho, \text{ where } b, m \neq 0, \text{ in Model IV.} \quad (14b) \quad 211$$

212 Recall that  $0 < \gamma < 1$ ,  $0 < c < 1$  with conformity, and  $1 < c < n$  with anti-conformity. In Models I 212  
and IV, inequalities (14a,b), respectively, cannot hold if  $\rho = 1$  or if  $\rho < 1$  and oblique transmission 213  
is conformist. However, with anti-conformity, if  $c$  is large enough (due to a large enough number 214  
of role models,  $n$ ), inequalities (14a,b) may hold. In Models II and III, inequality (14a) can hold 215  
with either  $\rho = 1$  or  $0 < \rho < 1$ , and in the latter case, with either conformity or anti-conformity. 216

217 We also compare invasion condition (10) under a mixture of vertical and oblique transmission 217  
( $0 < \rho < 1$ ; hereafter, "mixed" transmission) to the invasion condition with completely vertical 218  
transmission ( $\rho = 1$ ) given in (12). We isolate  $\beta$  on the left-hand side of inequality (10) in the cases 219  
of mixed transmission and completely vertical transmission, and determine when the right-hand 220  
side for the former can become smaller than that for the latter, meaning that the threshold for 221  
invasion is lower with mixed than with completely vertical transmission. 222

223 **Result 3. In additive models, the threshold for invasion by altruism is lower with 223  
mixed transmission ( $0 < \rho < 1$ ) than completely vertical transmission ( $\rho = 1$ ) if 224**

$$225 \quad bc(1 - \gamma) > 1 \text{ in Models I-III, and} \quad (15a) \quad 225$$

$$226 \quad c > 1 \text{ in Model IV.} \quad (15b) \quad 226$$

227 Inequalities (15a,b) do not hold with conformity, in accordance with Remark 1 (i). Inequality (15a) 227  
may hold with anti-conformity ( $1 < c < n$ ) if  $c$  is sufficiently large, and (15b) always holds with 228  
anti-conformity, in accordance with Remark 1 (ii). 229

230 *Remark 2. In Models I-III with completely oblique transmission ( $\rho = 0$ ), from inequality (13), 230  
invasion by altruism occurs if and only if (15a) holds. Therefore, in Models I-III, if the threshold 231  
for invasion is higher with mixed transmission than with completely vertical transmission, invasion 232  
is impossible with completely oblique transmission. 233*

234 Finally, the invasion threshold with mixed transmission is compared to that with completely 234  
oblique transmission ( $\rho = 0$ ) given in (13), except that rather than isolating  $\beta$  on one side of the 235  
two inequalities,  $\gamma$  is isolated (because  $\beta$  does not appear in inequality (13) for Models I-III). 236

237 **Result 4. In additive models, the threshold for invasion by altruism is lower with 237  
mixed transmission ( $0 < \rho < 1$ ) than completely oblique transmission ( $\rho = 0$ ) if 238**

$$239 \quad \beta b m_v > \frac{c - 1}{c} \text{ in Models I-III, and} \quad (16a) \quad 239$$

240  $1 > c$  in Model IV. (16b) 240

241 Inequalities (16a,b) hold with conformity, in accordance with Remark 1 (i). With anti-conformity, 241  
 242 (16a) may hold, but (16b) never holds, in accordance with Remark 1 (ii). 242

243 **3.2 Invasion by Altruism in the Multiplicative Case** 243

244 Conditions for invasion by altruism are derived from recursions in  $u_1$  and  $u_3$ , both of which have  $\beta$  244  
 245 replaced with  $(1 - \gamma)\beta$  in the multiplicative model. Therefore, Result 5 differs by Result 1 in that 245  
 246  $\beta$  is replaced by  $(1 - \gamma)\beta$  wherever it appears. 246

247 **Result 5. In multiplicative models, the condition for invasion by altruism of a popu-** 247  
 248 **lation that is initially all selfish is** 248

249  $(1 - \gamma)b[\rho(1 + m_v\beta) + (1 - \rho)c(1 + m_o\beta)] > 1,$  (17) 249

250 where  $m_v$  and  $m_o$  for each model are given in (11). Due to the reduction in the term 250  
 251 multiplying  $\beta$  in the multiplicative case, the threshold for invasion by altruism is higher in the 251  
 252 multiplicative than additive case in all models except when  $\rho = 0$  in Models I-III, in which cases 252  
 253 these thresholds are the same. It can be shown that Remarks 1 and 2 and Result 3 apply in 253  
 254 multiplicative as well as additive cases. Result 2 applies in the multiplicative case if the genetic 254  
 255 model being compared is also multiplicative. 255

256 **4 Conditions for Invasion by Allele A** 256

257 **4.1 Invasion by Allele A in the Additive Case** 257

258 Here, we find conditions for invasion by allele  $A$  of a population initially fixed on  $a$ . To simplify 258  
 259 this analysis, as in [28], we assume that  $b_{A_1} = b_{A_2} = b_A$  and  $b_{a_1} = b_{a_2} = b_a$ , where  $b_A$  ( $b_a$ ) is the 259  
 260 preference of carriers of allele  $A$  ( $a$ ) for altruism. Because the probability that an individual is an 260  
 261 altruist does not depend on which phenotype it acquired initially, only its allele, the extent  $(1 - \rho)$  261  
 262 and form ( $c$ ) of oblique transmission does not appear in recursions. Therefore, invasion conditions 262  
 263 for additive Models I-III are the same as those in [28], where  $\rho = 1$  was assumed (proof in ESM 7). 263

264 In additive Models I and II, there is no straightforward relationship between Hamilton's rule, 264  
 265 the preference difference  $b_A - b_a$ , and the condition for invasion [28]. In additive Model III, allele 265  
 266  $A$  invades if  $(\frac{1}{2}\beta - \gamma)(b_A - b_a) > 0$ ; therefore, an allele that increases the preference for altruism 266  
 267 ( $b_A > b_a$ ) invades if and only if Hamilton's rule holds [28]. Similarly, for Model IV (ESM 7), 267

268 **Result 6. In additive Model IV (assortative meeting), the condition for invasion by** 268  
 269 **allele A of a population that is initially fixed on allele a is** 269

270  $(m\beta - \gamma)(b_A - b_a) > 0.$  (18) 270

271 If  $b_A > b_a$ , (18) reduces to the condition for invasion by altruism with genetic transmission,  $m\beta > \gamma$ . 271

272 **4.2 Invasion by Allele A in the Multiplicative Case** 272

273 The allele invasion analyses for Models I-IV (ESM 7) are repeated, but with  $\beta(1 - \gamma)$  replacing  $\beta$  273  
 274 in the recursions for  $u_1$  and  $u_3$ . These analyses are in ESM 8, and the results are below. Recall 274  
 275  $b_{A_1} = b_{A_2} = b_A$  and  $b_{a_1} = b_{a_2} = b_a$ . 275

276 **Result 7. In multiplicative Models I and II (parent-to-offspring altruism), the condi-** 276  
 277 **tion for invasion by allele A of a population that is initially fixed on allele a is** 277

278  $(b_A - b_a)\{\gamma(1 - \gamma b_a) + \beta(1 - \gamma)(\gamma b_a - \frac{1}{2})\} < 0.$  (19) 278



279 If  $b_A > b_a$ , invasion by allele  $A$  occurs if  $\gamma < \frac{1}{2b_a}$  and  $\beta > \frac{\gamma(1-\gamma b_a)}{(1-\gamma)(\frac{1}{2}-\gamma b_a)}$ . Comparing invasion condi- 279  
 280 tion (19) in the multiplicative model to the corresponding invasion condition in the additive model 280  
 281 is not straightforward because the latter involves the root of a quadratic (ESM 7), so we conducted 281  
 282 a numerical analysis (code is available at <https://github.com/kaleda/altruism-conformity>). For 282  
 283 values of  $\beta, \gamma, b_a$ , and  $b_A$  separated by 0.01 ( $0.01 - 10^{-5}$  at bounds) and with  $\beta \leq 10$  and  $b_A > b_a$ , 283  
 284 we found no instances of invasion in the multiplicative, but not additive, model. Approximately 284  
 285 31.4% of cases showed invasion in the additive, but not multiplicative, model. 285

286 **Result 8. In multiplicative Model III (sibling-to-sibling altruism), the condition for** 286  
 287 **invasion by allele  $A$  of a population that is initially fixed on allele  $a$  is** 287

$$288 \quad \left(\frac{1}{2}\beta - \gamma\right)(b_A - b_a) - \frac{1}{2}\gamma\beta b_A(b_A + b_a) + \gamma b_a \beta > 0. \quad (20) \quad 288$$

289 It can be shown (ESM 8) that the threshold for invasion by allele  $A$  in Model III is lower in the 289  
 290 multiplicative than additive case if  $2b_a > b_A(b_A + b_a)$ , which always holds if  $b_A < b_a$ . 290

291 **Result 9. In multiplicative Model IV (assortative meeting), the condition for invasion** 291  
 292 **by allele  $A$  of a population that is initially fixed on allele  $a$  is** 292

$$293 \quad (b_A - b_a)\{m\beta - \gamma - \gamma\beta[m + (1 - m)b_a]\} > 0. \quad (21) \quad 293$$

294 If  $b_A > b_a$ , a necessary condition for invasion by  $A$  is  $m\beta > \frac{\gamma}{1-\gamma}$ . Compared to (18) for the additive 294  
 295 case, the invasion threshold in the multiplicative case (21) is lower if and only if  $b_A < b_a$  (ESM 8). 295

## 296 5 Discussion and Conclusions 296

297 In our models, individuals are haploid and sexually reproducing, transmission is vertical with 297  
 298 probability  $\rho$  or oblique with probability  $1 - \rho$ , and alleles  $A$  and  $a$  influence the tendency to become 298  
 299 altruistic through the preference parameters  $b_{A_1}, b_{A_2}, b_{a_1}, b_{a_2}$  (Figure 1). Oblique transmission may 299  
 300 be conformist or anti-conformist depending on the bias parameter  $c$ . Following Boyd and Richerson 300  
 301 [44],  $0 < c < 1$  with conformity and  $1 < c < n$  with anti-conformity, where  $n$  is the number of 301  
 302 cultural role models. We explore two kinds of parent-to-offspring altruism (Models I and II), sibling- 302  
 303 to-sibling altruism (Model III), and altruism between offspring that meet assortatively (Model IV). 303

304 To study invasion by altruism, we assume that the population is initially comprised of selfish 304  
 305 individuals ( $A_2$  and  $a_2$ ) that cannot become altruistic ( $b_{A_2} = b_{a_2} = 0$ ), and that the preference for 305  
 306 altruism is genotype-independent ( $b_{A_1} = b_{a_1} = b$ ). The threshold for invasion by altruism is lower 306  
 307 in the additive case than the multiplicative case for all models except when  $\rho = 0$  in Models I-III, 307  
 308 where these thresholds are the same. In all models, the threshold for invasion by altruism decreases 308  
 309 with increasing preference for altruism,  $b$ , and increasing tendency to anti-conform,  $c$  (Figure 2 and 309  
 310 ESM 6). When a new phenotype appears, conformity acts against its adoption because it is rare, 310  
 311 whereas anti-conformity facilitates its spread. 311

312 It is important to note that the roles of conformity and anti-conformity change as the frequency 312  
 313 of altruism changes, and conformity can facilitate the increase of altruism if it reaches a sufficiently 313  
 314 high frequency. Moreover, we assumed a random choice of role models, whereas if the population 314  
 315 were subdivided into groups [43, 44, 45, 47] or connected in networks [48, 49, 50, 51], the roles 315  
 316 of conformity and anti-conformity in the evolution of altruism may differ. In a group selection 316  
 317 model for the evolution of altruism as a cultural trait, Molleman et al. [47] showed that if altruism 317  
 318 had initially reached fixation in a single sub-group (e.g., due to stochastic effects), conformity may 318  
 319 favor its increase in the meta-population, but if altruism arose due to rare mutations in the initially 319  
 320 selfish population, conformity prevented its invasion. 320

321 We compared the threshold for invasion by altruism with cultural transmission to that with 321  
 322 purely genetic transmission. Although we performed this analysis in the additive case, our results 322

323 also hold when comparing the multiplicative versions of the two invasion conditions. In all models, 323  
324 the threshold for invasion can be lower with cultural transmission if there is mixed transmission 324  
325 ( $0 < \rho < 1$ ) and oblique transmission is anti-conformist. In Models II and III, the threshold can 325  
326 also be lower with cultural transmission if cultural transmission is completely vertical ( $\rho = 1$ ) or 326  
327 mixed ( $0 < \rho < 1$ ) with conformist oblique transmission. Thus, although the threshold for invasion 327  
328 by altruism is lower with anti-conformity than with conformity, in Models II and III the invasion 328  
329 threshold can be lower with conformity than with purely genetic transmission. 329

330 We also compared the threshold for invasion by altruism with mixed transmission to the thresh- 330  
331 old for invasion with completely vertical or completely oblique transmission. These analyses were 331  
332 performed in the additive case, but the following findings also hold in the multiplicative case. With 332  
333 conformity, increasing the extent of vertical transmission,  $\rho$ , lowers the threshold for invasion in 333  
334 all models. In Model IV with anti-conformity, decreasing  $\rho$  lowers the threshold for invasion. The 334  
335 relationship between  $\rho$  and invasion thresholds in Models I-III with anti-conformity is more com- 335  
336 plicated. Interestingly, in Models I-III, the threshold for invasion is lower with mixed transmission 336  
337 than with completely vertical transmission if  $bc(1 - \gamma) > 1$ , which is also the condition for invasion 337  
338 with completely oblique transmission ( $\rho = 0$ ). This condition does not involve the fitness benefit,  $\beta$ ; 338  
339 if altruism invades under completely oblique transmission, it does so not because of the fitness ben- 339  
340 efits it provides, but because of transmission biases. Similarly, Ram et al. [56] show that oblique 340  
341 transmission can prevent disfavored phenotypes from extinction by enabling the transmission of 341  
342 these phenotypes independently of reproduction. 342

343 To find conditions under which allele  $A$  invades a population fixed on  $a$ , we set  $b_{A_1} = b_{A_2} = b_A$ , 343  
344  $b_{a_1} = b_{a_2} = b_a$ , where  $b_A$  ( $b_a$ ) is the preference for altruism of carriers of allele  $A$  ( $a$ ). Invasion 344  
345 conditions for additive Models I-III are identical to those in [28], where  $\rho = 1$  was assumed. In 345  
346 additive Models I and II, there is no straightforward relationship between the invasion condition, 346  
347 Hamilton's rule, and the preference difference ( $b_A - b_a$ ). In additive Models III and IV, if  $b_A > b_a$  347  
348 ( $A$  produces a greater preference for altruism than  $a$ ), invasion occurs if  $\frac{1}{2}\beta > \gamma$  or  $m\beta > \gamma$ , 348  
349 respectively, which are the invasion conditions under purely genetic transmission [28, 54]. 349

350 The threshold for invasion by an allele that increases the preference for altruism ( $b_A > b_a$ ) is 350  
351 higher in the multiplicative case than the additive case for Model IV. Similarly, in Models I and 351  
352 II, we found many examples of invasion in the additive, but not multiplicative, case, but not vice 352  
353 versa. However, in Model III, the threshold for invasion by  $A$  with  $b_A > b_a$  may be lower in the 353  
354 multiplicative case than the additive case. 354

355 In these models, the genotype that determined the preference for altruism included one allele at 355  
356 one locus. However, an individual's preference for altruism may be affected by more than one locus 356  
357 (as in [24]) or more than one allele at a given locus (as in [22]). It would be interesting to determine 357  
358 how a more complex relationship between genotype and preference for altruism affects the results 358  
359 of these models. In addition, in these models, encounters occurred between parents and offspring, 359  
360 between siblings, or between individuals that assorted by phenotype. Results would likely differ if 360  
361 encounters occurred between other kinds of relatives or if assortment were incorporated differently 361  
362 (see [57, 58] for a general treatment of non-random encounters). 362

363 In conclusion, when altruism is culturally transmitted, conditions for its invasion differ from 363  
364 those under purely genetic transmission. The threshold for invasion by altruism is lower with 364  
365 anti-conformity than with conformity, and in some models, can be lower with anti-conformity or 365  
366 conformity compared to purely genetic transmission. Incorporating additive rather than multiplica- 366  
367 tive fitness components produces a lower invasion threshold in all models except Models I-III with 367  
368 entirely oblique transmission, where these thresholds are identical. For an allele,  $A$ , that produces 368  
369 a greater preference for altruism than the resident allele,  $a$ , invasion conditions do not depend on 369  
370 the extent of oblique transmission or conformity. Invasion conditions for additive Models III and IV 370

371 are the same as those under purely genetic transmission, whereas invasion conditions for additive 371  
372 Models I and II differ from Hamilton's rule. In all models, the threshold for invasion by  $A$  may be 372  
373 lower under additive than multiplicative fitness combinations, and in Model III it can also be lower 373  
374 under multiplicative than additive combinations. 374

### 375 **Acknowledgements** 375

376 This research was supported by the Stanford Center for Computational, Evolutionary and Human 376  
377 Genomics (KKD, MWF), Morrison Institute for Population and Research Studies at Stanford 377  
378 University (KKD, MWF), Israel Science Foundation 552/19 (YR), and Minerva Stiftung Center 378  
379 for Lab Evolution (YR). 379

### 380 **Author Contributions** 380

381 KKD and MWF designed the research; KKD, YR, and MWF performed the research and wrote 381  
382 the paper. 382

Figure 1: Preference parameters,  $b_i$ . In the left column, four offspring have initially inherited either phenotype 1, altruism (in blue) or phenotype 2, selfishness (in red) due to vertical or oblique transmission. They have also inherited either allele  $A$  or  $a$ , and their phenogenotypes are shown to their left. The right column depicts these offspring either retaining their original phenotype or switching to the other phenotype, with probabilities given beside the respective arrows. If the initial phenogenotype was  $i$ , the probability that the final phenotype is 1 is  $b_i$  and the probability the final phenotype is 2 is  $1 - b_i$ .

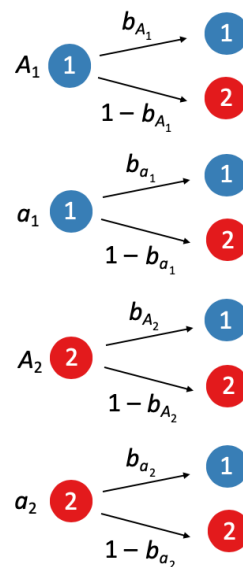

383

383

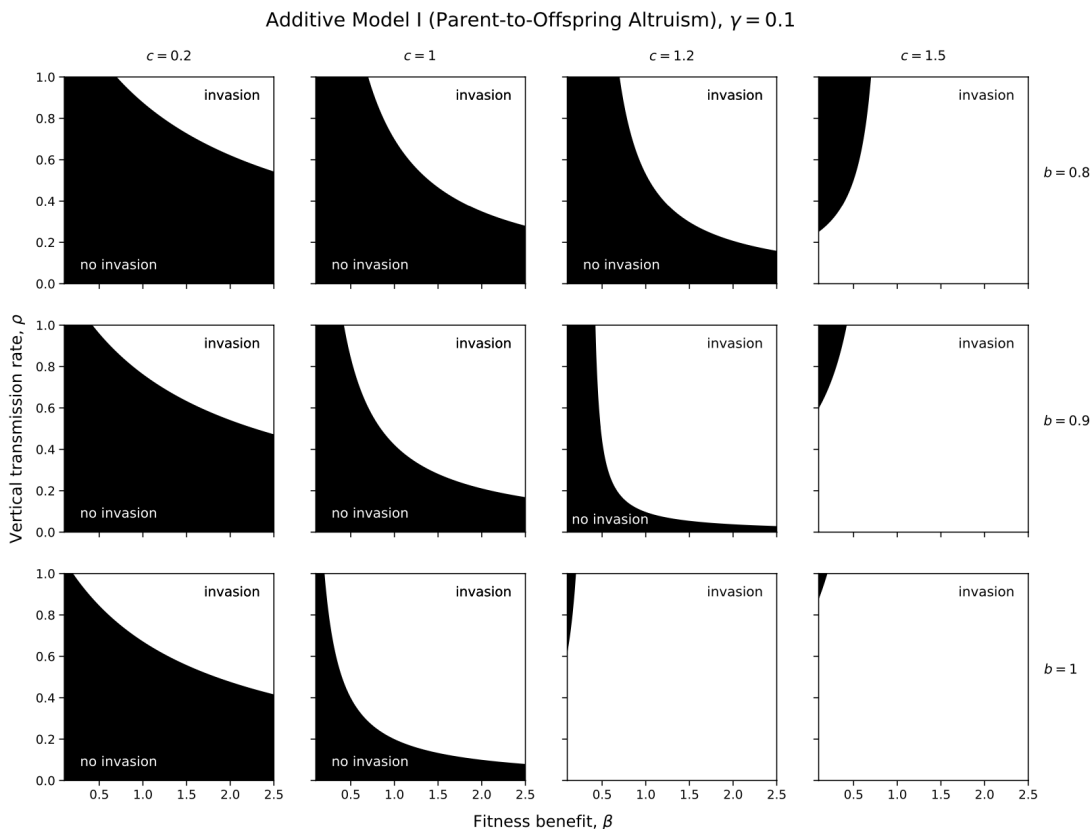

Figure 2: Conditions under which altruism invades in additive Model I (inequality 10), where the cost of altruism ( $\gamma$ ) is fixed at 0.1. In light areas, (10) holds and altruism invades; in dark areas, it does not. In the far left column there is conformity, in the second column from the left there is random copying, and the two right-most columns there is anti-conformity. The top row includes a weaker preference for altruism than the middle row, and the bottom row includes the strongest possible preference for altruism. Recall that  $b_{A_1} = b_{a_1} = b$  in deriving inequality (10).

## 384 References

- 385 [1] Henrich J, Henrich N. Why Humans Cooperate: A Cultural and Evolutionary Explanation. 385  
386 Oxford University Press; 2007. 386
- 387 [2] Wilson EO. The Insect Societies. Harvard University Press; 1971. 387
- 388 [3] Jarvis JUM. Eusociality in a mammal: Cooperative breeding in naked mole-rat colonies. 388  
389 Science. 1981;212:571–573. 389
- 390 [4] Jarvis JUM, Bennett NC. Eusociality has evolved independently in two genera of bathyergid 390  
391 mole-rats—but occurs in no other subterranean mammal. Behavioral Ecology and Sociobiology. 391  
392 1993;33:253–260. 392
- 393 [5] Darwin C. On the Origin of Species by Means of Natural Selection. John Murray, London; 393  
394 1859. 394
- 395 [6] Haldane JBS. The Causes of Evolution. Longmans, Green and Co. London; 1932. 395
- 396 [7] Hamilton WD. The genetical evolution of social behavior I. Journal of Theoretical Biology. 396  
397 1964a;7:1–16. 397
- 398 [8] Hamilton WD. The genetical evolution of social behavior II. Journal of Theoretical Biology. 398  
399 1964b;7:17–52. 399
- 400 [9] Cavalli-Sforza LL, Feldman MW. Darwinian selection and “altruism”. Theoretical Population 400  
401 Biology. 1978;14:268–280. 401
- 402 [10] Uyenoyama MK, Feldman MW. Theories of kin and group selection: A population genetics 402  
403 perspective. Theoretical Population Biology. 1980;17:380–414. 403
- 404 [11] Axelrod R, Hamilton WD. The evolution of cooperation. Science. 1981;211:1390–1396. 404
- 405 [12] Sober E, Wilson DS. Unto Others: The Evolution and Psychology of Unselfish Behavior. 405  
406 Harvard University Press; 1998. 406
- 407 [13] Nowak MA. Five rules for the evolution of cooperation. Science. 2006;314:1560–1563. 407
- 408 [14] Maynard Smith J. Group selection and kin selection. Nature. 1964;201(4924):1145–1147. 408
- 409 [15] Charnov EL. An elementary treatment of the genetical theory of kin selection. Journal of 409  
410 Theoretical Biology. 1977;66:541–550. 410
- 411 [16] Charlesworth B. Some models of the evolution of altruistic behavior between siblings. Journal 411  
412 of Theoretical Biology. 1978;72:297–319. 412
- 413 [17] Wade MJ. The evolution of social interactions by family selection. The American Naturalist. 413  
414 1979;113(3):399–417. 414
- 415 [18] Crow JF, Kimura M. An Introduction to Population Genetics Theory. New York: Harper and 415  
416 Row; 1970. 416
- 417 [19] Charlesworth B. Models of kin selection. In: Markl H, editor. Evolution of social behavior: 417  
418 hypotheses and empirical tests. Berlin: Dahlem Konferenzen; 1980. p. 11–26. 418

- 419 [20] Mueller LD, Feldman MW. The evolution of altruism by kin selection: New phenomena with 419  
420 strong selection. *Ethology and Sociobiology*. 1988;9:223–229. 420
- 421 [21] Uyenoyama M, Feldman MW. On relatedness and adaptive topography in kin selection. The- 421  
422 oretical Population Biology. 1981;19:87–123. 422
- 423 [22] Uyenoyama MK, Feldman MW, Mueller LD. Population genetic theory of kin selection: Mul- 423  
424 tiple alleles at one locus. *Proceedings of the National Academy of Sciences*. 1981;78:5036–5040. 424
- 425 [23] Matessi C, Karlin S. On the evolution of altruism by kin selection. *Proceedings of the National* 425  
426 *Academy of Sciences*. 1984;81:1754–1758. 426
- 427 [24] Mueller LD, Feldman MW. Population genetic theory of kin selection: A two-locus model. 427  
428 *The American Naturalist*. 1985;125(4):535–549. 428
- 429 [25] Uyenoyama MK, Feldman MW. Population genetic theory of kin selection II. *The American* 429  
430 *Naturalist*. 1982;120:614–627. 430
- 431 [26] Lewin-Epstein O, Aharonov R, Hadany L. Microbes can help explain the evolution of host 431  
432 altruism. *Nature Communications*. 2017;8:14040. 432
- 433 [27] Lewin-Epstein O, Hadany L. Host-microbiome coevolution can promote cooperation in a rock- 433  
434 paper-scissors dynamics. *Proceedings of the Royal Society B*. 2020;287:20192754. 434
- 435 [28] Feldman MW, Cavalli-Sforza LL, Peck JR. Gene-culture coevolution: Models for the evolution 435  
436 of altruism with cultural transmission. *Proceedings of the National Academy of Sciences*. 436  
437 1985;82:5814–5818. 437
- 438 [29] Birch J. Hamilton’s rule and its discontents. *British Journal for the Philosophy of Science*. 438  
439 2014;65:381–411. 439
- 440 [30] Eshel I. On the neighbor effect and the evolution of altruistic traits. *Theoretical Population* 440  
441 *Biology*. 1972;3:258–277. 441
- 442 [31] Wilson DS, Sober E. Reintroducing group selection to the human behavioral sciences. *Behav-* 442  
443 *ioral and Brain Sciences*. 1994;17:585–608. 443
- 444 [32] Wilson EO, Hölldobler B. Eusociality: Origin and consequences. *Proceedings of the National* 444  
445 *Academy of Sciences*. 2005;102:13367–13371. 445
- 446 [33] Traulsen A, Nowak MA. Evolution of cooperation by multilevel selection. *Proceedings of the* 446  
447 *National Academy of Sciences*. 2006;103:10952–10955. 447
- 448 [34] Trivers RL. The evolution of reciprocal altruism. *The Quarterly Review of Biology*. 1971;46:35– 448  
449 57. 449
- 450 [35] Nowak MA, Sigmund K. The dynamics of indirect reciprocity. *Journal of Theoretical Biology*. 450  
451 1998;194:561–574. 451
- 452 [36] Price GR. Selection and covariance. *Nature*. 1970;227:520–521. 452
- 453 [37] Queller DC. A general model for kin selection. *Evolution*. 1992;46(2):376–380. 453
- 454 [38] Frank SA. The Price Equation, Fisher’s Fundamental Theorem, kin selection, and causal 454  
455 analysis. *Evolution*. 1997;51(6):1712–1729. 455

- 456 [39] Gardner A, West SA, Wild G. The genetical theory of kin selection. *Journal of Evolutionary* 456  
457 *Biology*. 2011;24:1020–1043. 457
- 458 [40] Okasha S. On Hamilton’s rule and inclusive fitness theory with nonadditive payoffs. *Philosophy* 458  
459 *of Science*. 2016;83:873–883. 459
- 460 [41] Nowak MA, McAvoy A, Allen B, Wilson EO. The general form of Hamilton’s rule makes no 460  
461 predictions and cannot be tested empirically. *Proceedings of the National Academy of Sciences*. 461  
462 2017;114:5665–5670. 462
- 463 [42] Aguilar EG, Akçay E. Gene-culture coinheritance of a behavioral trait. *The American Natu-* 463  
464 *ralist*. 2018;192(3):000–000. 464
- 465 [43] Boyd R, Richerson PJ. Cultural transmission and the evolution of cooperative behavior. 465  
466 *Human Ecology*. 1982;10:325–351. 466
- 467 [44] Boyd R, Richerson PJ. *Culture and the Evolutionary Process*. University of Chicago Press; 467  
468 1985. 468
- 469 [45] Lehmann L, Feldman MW. The co-evolution of culturally inherited altruistic helping 469  
470 and cultural transmission under random group formation. *Theoretical Population Biology*. 470  
471 2008;73(4):506–516. 471
- 472 [46] Lehmann L, Feldman MW, Foster KR. Cultural transmission can inhibit the evolution of 472  
473 altruistic helping. *The American Naturalist*. 2008;172(1):12–24. 473
- 474 [47] Molleman L, Quiñones AE, Weissing FJ. Cultural evolution of cooperation: The inter- 474  
475 play between forms of social learning and group selection. *Evolution and Human Behavior*. 475  
476 2013;34:342–349. 476
- 477 [48] Peña J, Volken H, Pestelacci E, Tomassini M. Conformity hinders the evolution of cooperation 477  
478 in scale-free networks. *Physical Review*. 2009;80(016110). 478
- 479 [49] Javarone MA, Atzeni AE, Galam S. Emergence of cooperation in the Prisoner’s Dilemma 479  
480 driven by conformity. In: Mora A, Squillero G, editors. *EvoApplications: Applications of* 480  
481 *Evolutionary Computation, Lecture Notes in Computer Science*. vol. 9028. Springer, Cham; 481  
482 2015. . 482
- 483 [50] Szolnoki A, Perc M. Conformity enhances network reciprocity in evolutionary social dilemmas. 483  
484 *Journal of the Royal Society Interface*. 2015;12(20141299). 484
- 485 [51] Shu F, Liu Y, Liu X, Zhou X. Memory-based conformity enhances cooperation in social 485  
486 dilemmas. *Applied Mathematics and Computation*. 2019;346:480–490. 486
- 487 [52] Allison PD. Cultural relatedness under oblique and horizontal transmission rules. *Ethology* 487  
488 *and Sociobiology*. 1992;13:153–167. 488
- 489 [53] Whiten A. Chapter two - conformity and over-imitation: an integrative review of variant forms 489  
490 of hyper-reliance on social learning. In: Naguib M, editor. *Advances in the Study of Behavior*. 490  
491 vol. 51. Elsevier Inc.; 2019. . 491
- 492 [54] Eshel I, Cavalli-Sforza LL. Assortment of encounters and evolution of cooperativeness. *Pro-* 492  
493 *ceedings of the National Academy of Sciences*. 1982;79:1331–1335. 493

- 494 [55] Denton KK, Y, Liberman U, Feldman MW. Cultural evolution of conformity and anticonfor- 494  
495 mity. *Proceedings of the National Academy of Sciences*. 2020;117:13603–13614. 495
- 496 [56] Ram Y, Liberman U, Feldman MW. Evolution of vertical and oblique transmission under 496  
497 fluctuating selection. *Proceedings of the National Academy of Sciences*. 2018;115(6):E1174– 497  
498 E1183. 498
- 499 [57] Fletcher JA, Doebeli M. A simple and general explanation for the evolution of altruism. 499  
500 *Proceedings of the Royal Society B*. 2009;276:13–19. 500
- 501 [58] Bijma P, Aanen DK. Assortment, Hamilton’s rule and multilevel selection. *Proceedings of the* 501  
502 *Royal Society B*. 2010;277:673–675. 502
